# Supplementary material
Source: PubMed Central journal article supplement (PMC1567671)

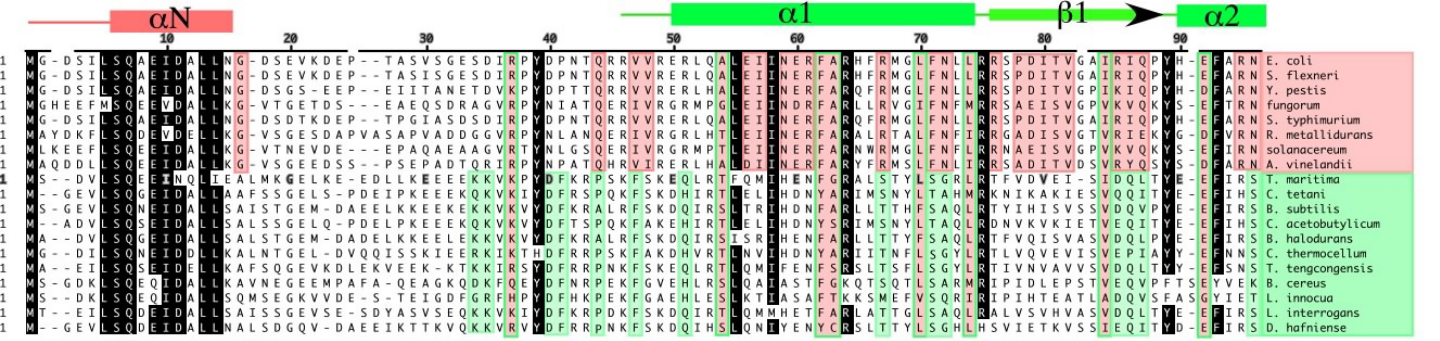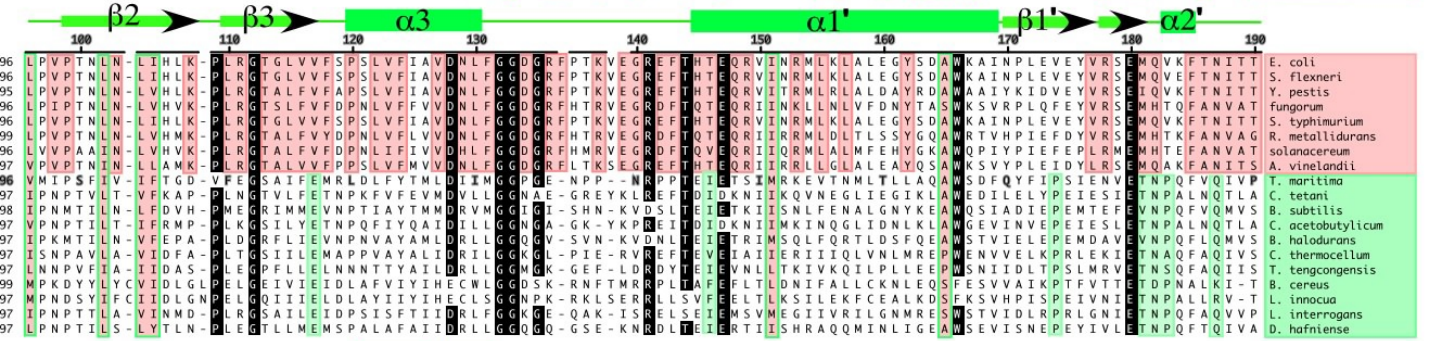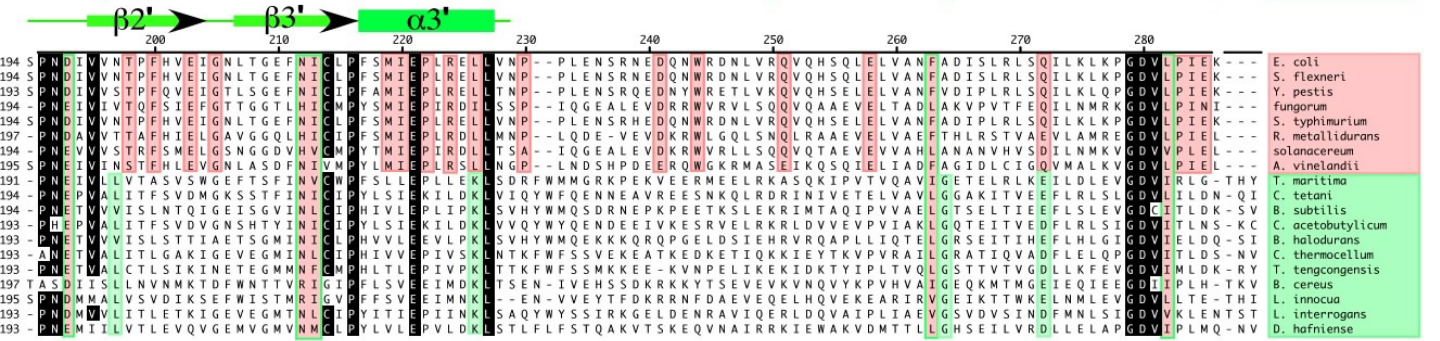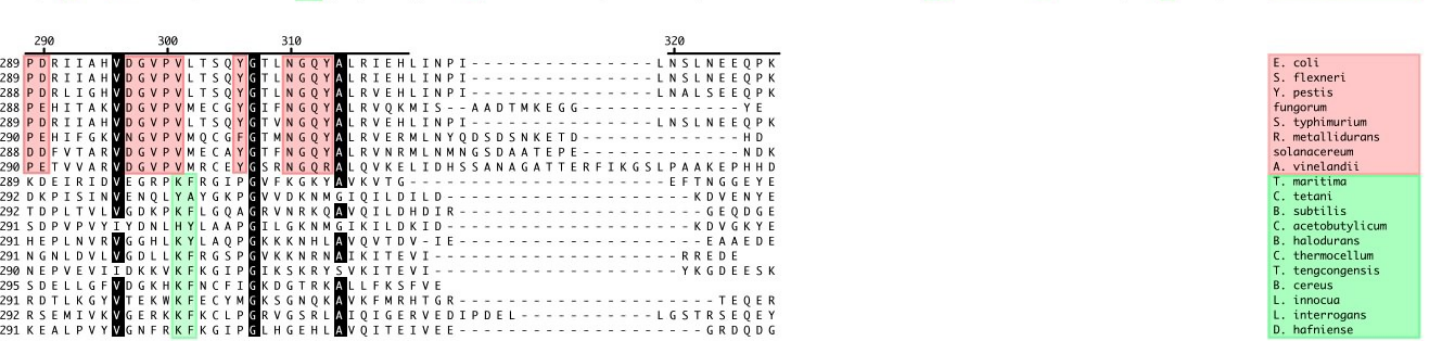

Supplement: pnas_0602811103_1.pdf [file pnas_0602811103_1.pdf]

FliM  
CheC

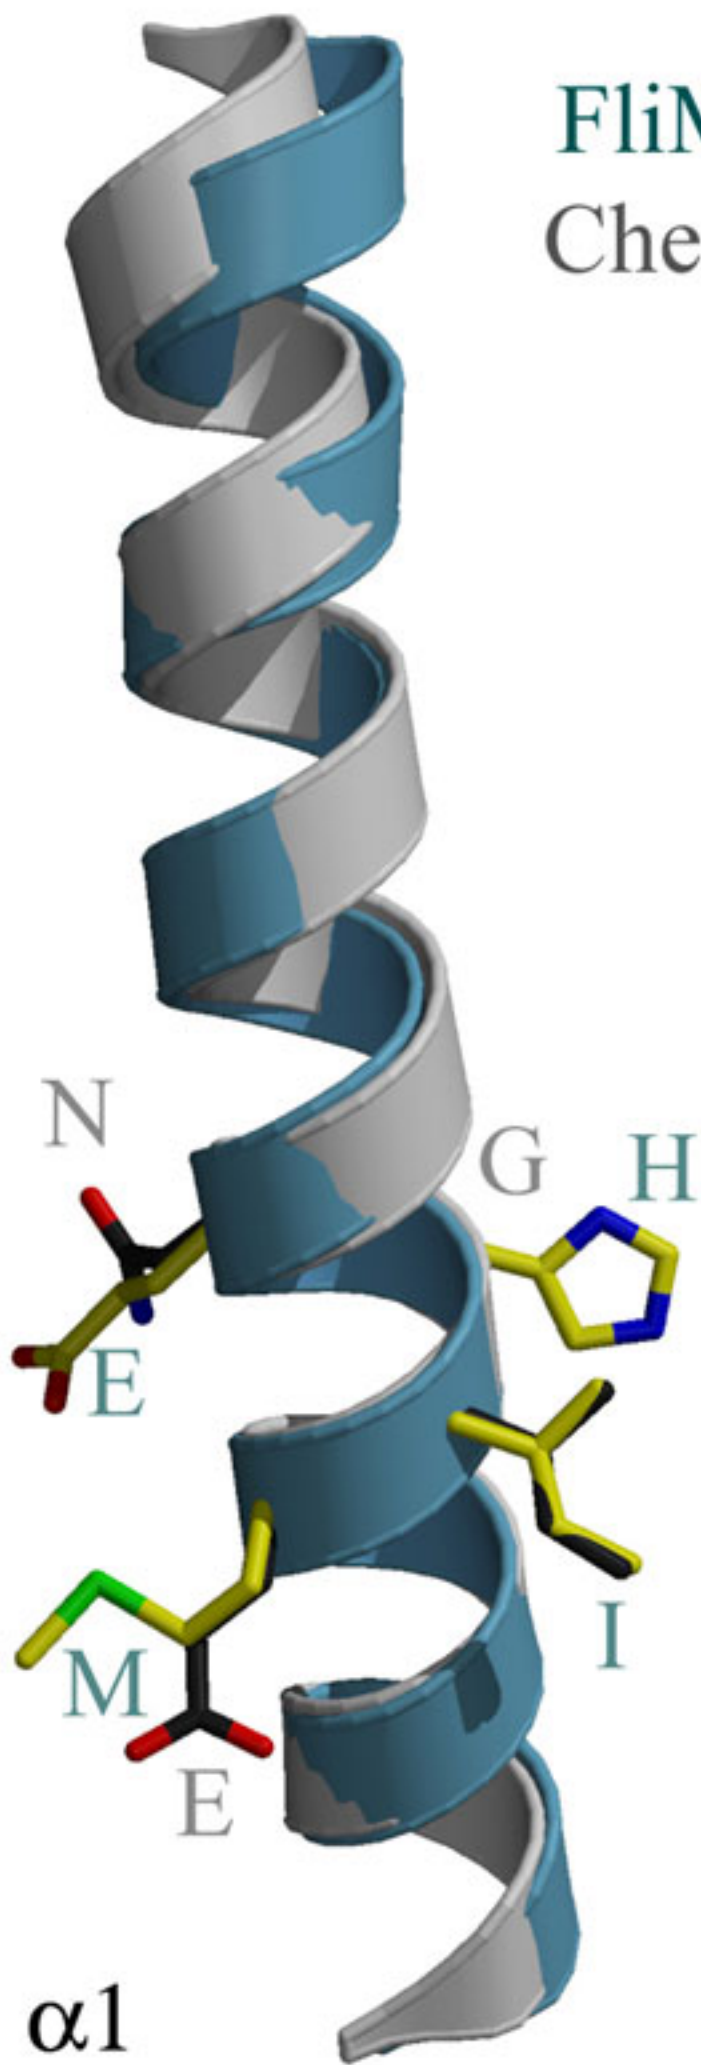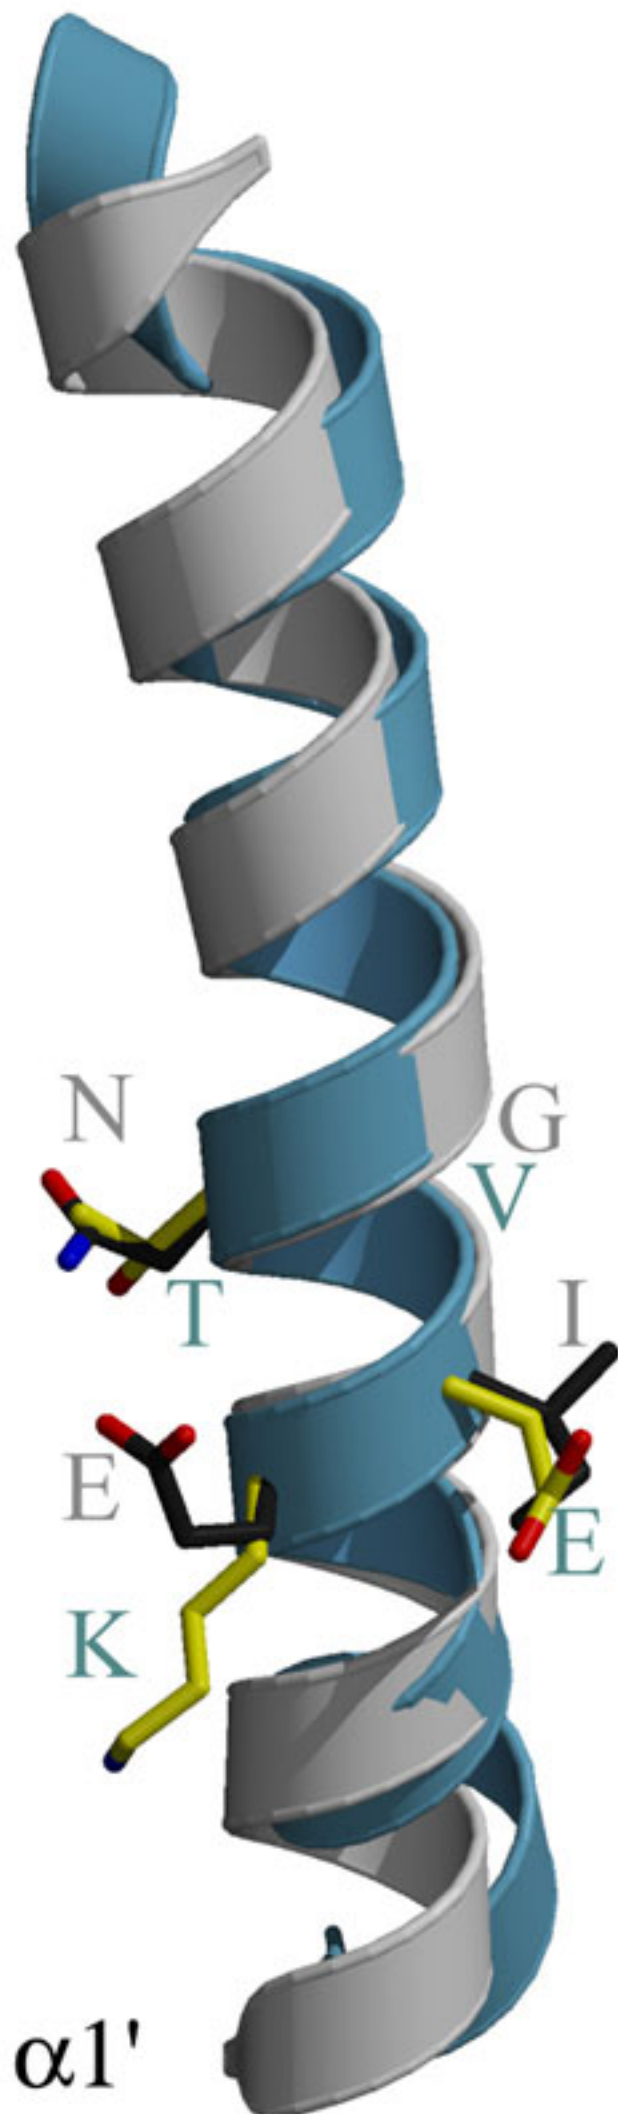

Supplement: pnas_0602811103_2.pdf [file pnas_0602811103_2.pdf]
